# Supplementary material
Source: Springer Nature journal article supplement (https://www.springermedizin.de/resource/supplementary/13054_2013_2485_MOESM1_ESM.pdf/9714136)

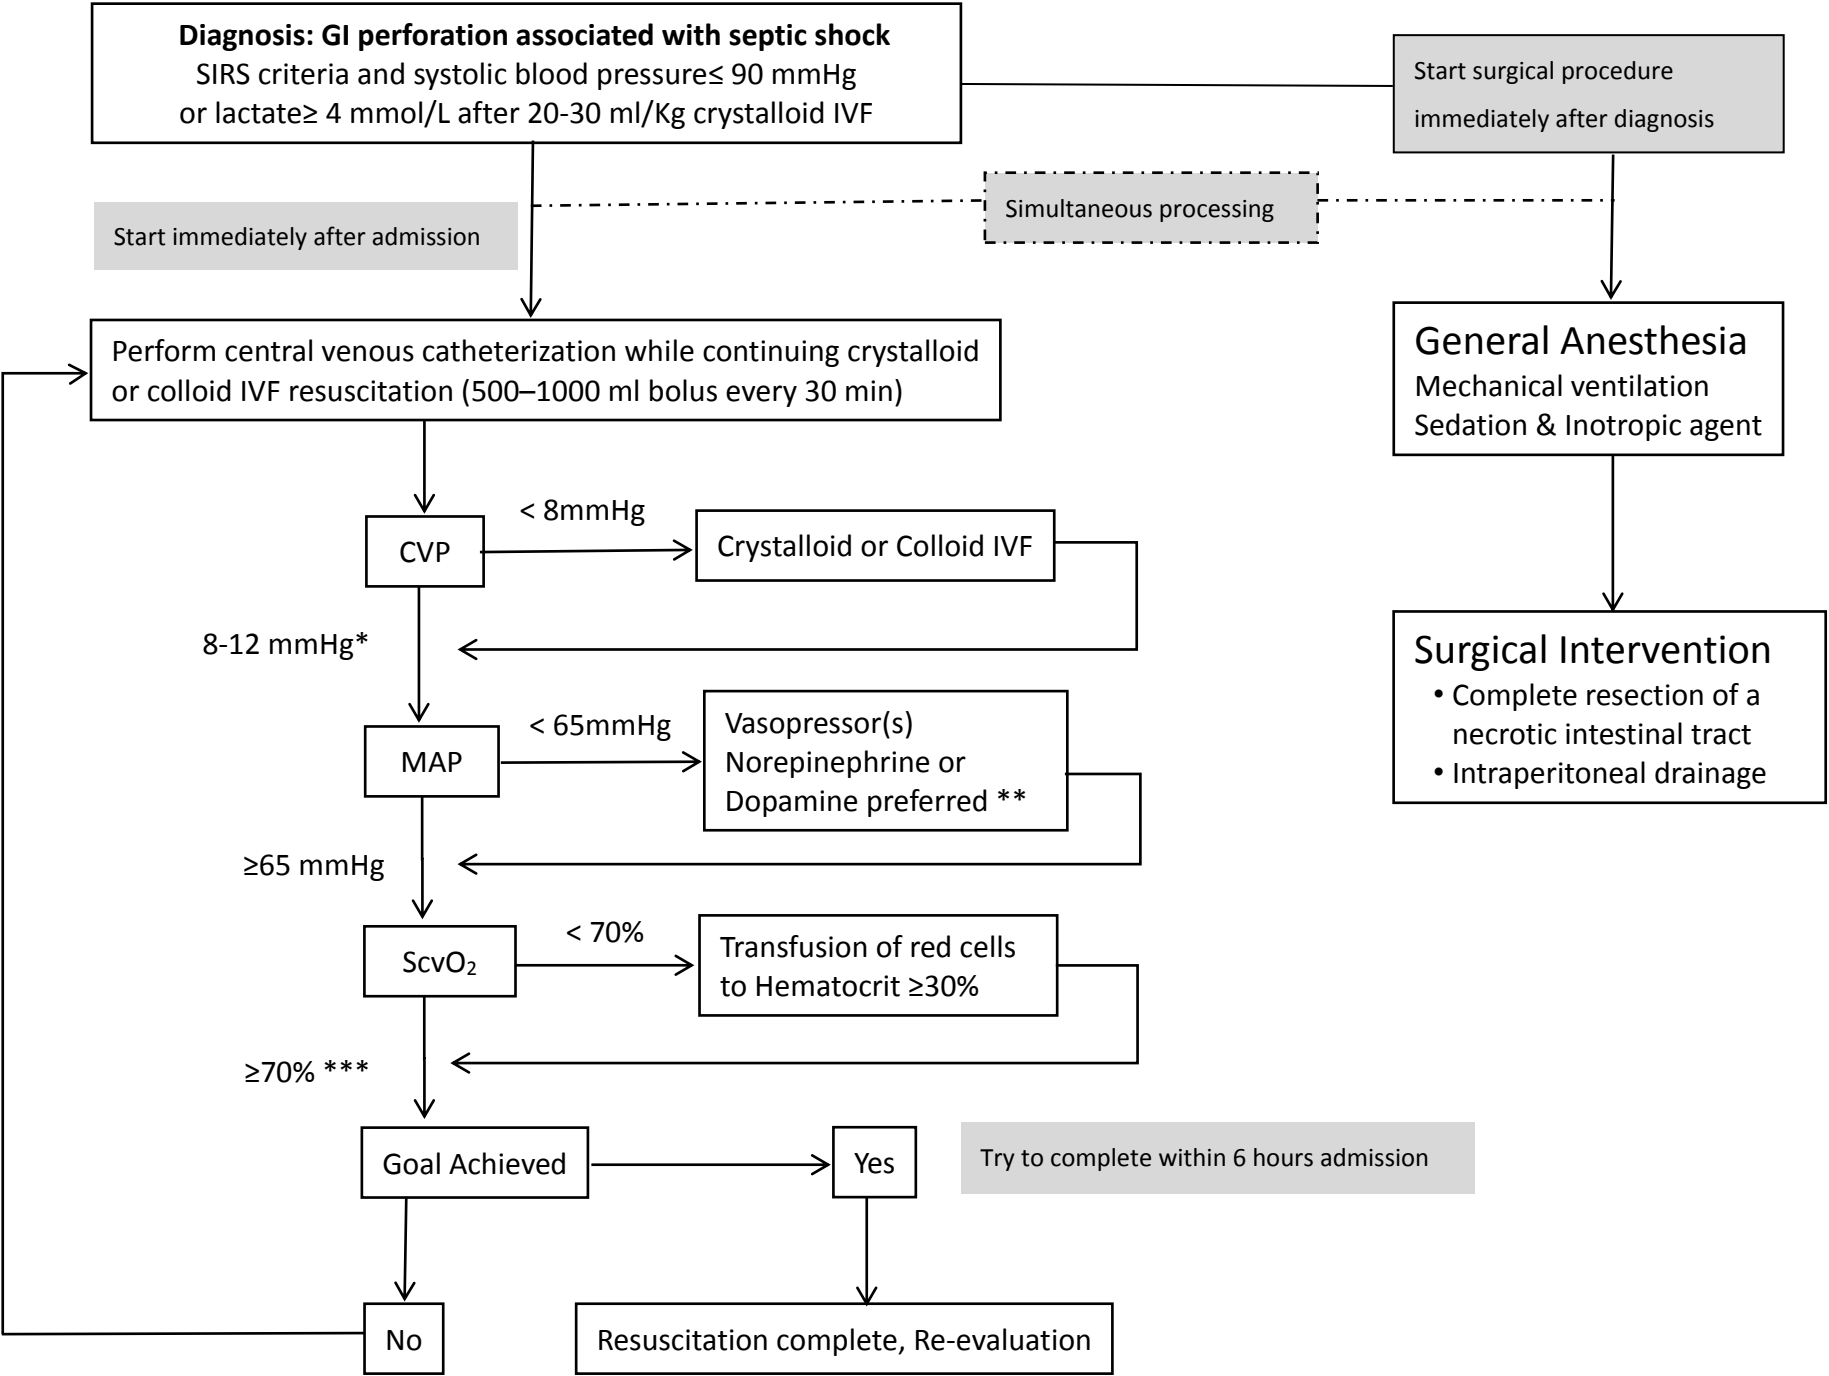

Supplement: MOESM1 [file 9714136]
